1           **Intestinal transkingdom analysis on the impact of antibiotic**  
2                           **perturbation in health and critical illness**

3 Bastiaan W. Haak<sup>1\*</sup>, Ricard Argelaguet<sup>2</sup>, Cormac M. Kinsella<sup>3</sup>, Robert F.J. Kullberg<sup>1</sup>,  
4 Jacqueline M. Lankelma<sup>1</sup>, Theodorus B.M. Hakvoort<sup>5</sup>, Floor Hugenholtz<sup>1</sup>, Sarantos Kostidis<sup>4</sup>,  
5 Martin Giera<sup>4</sup>, Wouter J. de Jonge<sup>5</sup>, Marcus J. Schultz<sup>6</sup>, Tom van Gool<sup>7</sup>, Tom van der Poll<sup>1,10</sup>,  
6 Willem M. de Vos<sup>8,9</sup>, Lia van den Hoek<sup>3</sup>, W. Joost Wiersinga<sup>1,10\*</sup>

7

8 <sup>1</sup>Center for Experimental and Molecular Medicine, Amsterdam UMC, Location AMC,  
9 Amsterdam Infection & Immunity Institute, Amsterdam, The Netherlands

10 <sup>2</sup>European Molecular Biology Laboratory, European Bioinformatics Institute, Hinxton,  
11 Cambridge, United Kingdom

12 <sup>3</sup>Laboratory of Experimental Virology, Department of Medical Microbiology, Amsterdam UMC,  
13 Location AMC, Amsterdam, the Netherlands

14 <sup>4</sup>Center for Proteomics and Metabolomics, Leiden University Medical Center, Leiden, The  
15 Netherlands

16 <sup>5</sup>Tytgat Institute for Liver and Intestinal Research, Amsterdam UMC, Location AMC,  
17 Amsterdam, The Netherlands

18 <sup>6</sup>Department of Intensive Care, Amsterdam UMC, Location AMC, Amsterdam, The  
19 Netherlands

20 <sup>7</sup>Department of Parasitology, Amsterdam UMC, Location AMC, Amsterdam, The Netherlands

21 <sup>8</sup>Laboratory of Microbiology, Wageningen University, Wageningen, The Netherlands

22 <sup>9</sup>Research Programs Unit Immunobiology, Department of Bacteriology and Immunology,  
23 Helsinki University, Helsinki, Finland

24 <sup>10</sup>Department of Medicine, Division of Infectious Diseases, Amsterdam UMC, Location AMC,  
25 Amsterdam, The Netherlands

26

27 **Running title:** Transkingdom impact of broad-spectrum antibiotics

28

29 **\*Correspondence:**

30 BWH ([b.w.haak@amsterdamumc.nl](mailto:b.w.haak@amsterdamumc.nl))

31 WJW ([w.j.wiersinga@amsterdamumc.nl](mailto:w.j.wiersinga@amsterdamumc.nl))

## 32 **Abstract**

33 Bacterial microbiota play a critical role in mediating local and systemic immunity, and shifts in  
34 these microbial communities have been linked to impaired outcomes in critical illness.  
35 Emerging data indicate that other intestinal organisms, including bacteriophages, viruses of  
36 eukaryotes, fungi, and protozoa, are closely interlinked with the bacterial microbiota and their  
37 host, yet their collective role during antibiotic perturbation and critical illness remains to be  
38 elucidated. Here, multi-omics factor analysis (MOFA), a novel computational strategy to  
39 systematically integrate viral, fungal and bacterial sequence data, we describe the functional  
40 impact of exposure to broad-spectrum antibiotics in healthy volunteers and critically ill patients.  
41 We observe that a loss of the anaerobic intestinal environment is directly correlated with an  
42 overgrowth of aerobic pathobionts and their corresponding bacteriophages, as well as an  
43 absolute enrichment of opportunistic yeasts capable of causing invasive disease. These  
44 findings further illustrate the complexity of transkingdom interactions within the intestinal  
45 environment, and show that modulation of the bacterial component of the microbiome has  
46 implications extending beyond this kingdom alone.

47

## 48 **Introduction**

49 In recent years, widespread efforts have been dedicated on elucidating the immunomodulatory  
50 impact of intestinal microorganisms in health and disease (Belkaid & Hand, 2014; Honda &  
51 Littman, 2012). Animal studies have shown that broad-spectrum antibiotic modulation of the  
52 intestinal microbiota enhances susceptibility to enteric and systemic infections (Schuijt *et al*,  
53 2015; Clarke *et al*, 2010; Buffie & Pamer, 2013). In line with these preclinical findings, our  
54 group and others have observed that exposure to broad-spectrum antimicrobial therapy  
55 profoundly distorts the composition of the intestinal microbes of critically ill patients in the  
56 Intensive Care Unit (ICU) (Lankelma *et al*, 2017b; McDonald *et al*, 2016; Zaborin *et al*, 2016).  
57 These disruptions within the intestinal environment enable the rapid expansion of opportunistic  
58 pathobionts and nosocomial infections, including infections with vancomycin-resistant  
59 enterococci as well as invasive disease by antibiotic-resistant Enterobacteriaceae (Haak &  
60 Wiersinga, 2017; Taur *et al*, 2012; Agudelo-Ochoa *et al*, 2020).

61 Traditionally, viruses were considered solely pathogens; however, growing evidence suggests  
62 a more dynamic relationship between the virome and the host, mediated through direct  
63 interactions with the bacterial microbiome (Shkoporov & Hill, 2019; Norman *et al*, 2014; Pfeiffer  
64 & Virgin, 2016; Neil & Cadwell, 2018). Viruses influence immune development and shape

65 tissue architecture (Kuss *et al*, 2011; De Sordi *et al*, 2019), and changes in the composition of  
66 viral communities have been associated with disease severity in inflammatory bowel disease  
67 (IBD), acquired immune deficiency syndrome (AIDS), and the development of Graft versus  
68 Host Disease (GvHD) (Shkoporov & Hill, 2019; Legoff *et al*, 2017; Zuo *et al*, 2019). Similarly,  
69 intestinal fungi have recently been acknowledged as a small but potentially important part of  
70 the intestinal ecosystem and have been shown to play a potentially immunomodulatory role in  
71 the development of colorectal cancer, IBD, and irritable bowel syndrome (IBS) (Sokol *et al*,  
72 2017; Botschuijver *et al*, 2017; Sovran *et al*, 2018; Richard & Sokol, 2019). In addition, a recent  
73 study reported that a reduction of anaerobic bacteria during the course of allogeneic  
74 hematopoietic stem cell transplantation directly facilitates the intestinal overgrowth of specific  
75 *Candida* species, ultimately culminating in invasive fungal disease (Zhai *et al*, 2020).

76 While these findings provide clues that specific cross-kingdom interactions potentially  
77 contribute to or exacerbate disease, a large knowledge gap remains on the composition,  
78 interactions and functions of fungi and viruses following exposure to broad-spectrum  
79 antibiotics, both in healthy volunteers and in patients with critical illness. Hence, there is an  
80 increasing need for unsupervised integrative computational frameworks that can robustly and  
81 systematically identify underlying patterns of variation across these communities in health and  
82 disease (Shkoporov & Hill, 2019; Richard & Sokol, 2019).

83

## 84 **Results and Discussion**

85 To examine the extent of these transkingdom interactions during critical illness, we collected  
86 faecal samples from 33 patients (mean age 64 years; 48% male; **Table EV1**) admitted to the  
87 Intensive Care Unit (ICU) of the Amsterdam University Medical Centres, location Academic  
88 Medical Centre, Amsterdam, the Netherlands. Of these patients, 24 were admitted with sepsis  
89 while nine patients had a non-infectious diagnosis (non-septic ICU). All ICU patients were  
90 treated with between one and nine different classes of antimicrobial agents (**Fig. EV1**).  
91 Thirteen healthy non-smoking volunteers were evaluated as controls. Six healthy subjects  
92 received oral broad-spectrum antibiotics (ciprofloxacin 500 mg q12h, vancomycin 500 mg q8h  
93 and metronidazole 500 mg q8h) for seven days, whereas seven subjects did not receive  
94 antibiotics. Subjects were asked to collect faecal samples before antibiotic treatment and one  
95 day after completing the course of antibiotics.

96 We performed sequencing of the V3-V4 region of the bacterial 16S ribosomal RNA (rRNA)  
97 gene and the fungal Intergenic Transcribed Spacer (ITS)1 rRNA gene, seeking to examine

98 community compositions by characterizing fungal and bacterial sequences into exact  
99 amplicon-sequencing variants (ASVs) (Callahan *et al*, 2016). We simultaneously  
100 performed virus discovery next-generation sequencing (VIDISCA-NGS) (van der Hoek *et al*,  
101 2012) using a validated virome-enriched library preparation (Edridge *et al*, 2019; Kinsella *et al*,  
102 2019). Finally, we measured the presence or absence of intestinal gut protozoa using targeted  
103 polymerase chain reaction (PCR).

104 The bacterial microbiome of ICU patients and volunteers exposed to antibiotics included in this  
105 study has been described previously by our group (Lankelma *et al*, 2017b; Haak *et al*, 2019)  
106 (**Fig. 1a**). Bacterial alpha diversity and richness dropped significantly in ICU patients and  
107 healthy subjects exposed to antibiotics, with the latter most significantly impacted in both  
108 metrics (**Fig. 1b**). In line with earlier observations (Hallen-adams & Suhr, 2017; Suhr & Hallen-  
109 Adams, 2015; Nash *et al*, 2017), fungal communities were dominated by *Candida* and  
110 *Saccharomyces*, while *Malassezia* and *Aspergillus* were also frequently observed. Overall,  
111 fungal diversity metrics were comparable between critically ill patients and healthy controls  
112 not exposed to antibiotics, while significant drops in diversity were observed in healthy subjects  
113 after exposure to antibiotics. Viral communities were largely dominated by environmental  
114 single stranded (ss)RNA viruses and bacteriophages of the order Caudovirales. Strikingly,  
115 around 50% of the abundance of the virome consisted of cross-assembly (crAss) phages,  
116 which have recently been connected to *Bacteroides* spp (Dutilh *et al*, 2014; Shkoporov *et al*,  
117 2018). No differences in viral alpha diversity were observed, yet both septic ICU patients and  
118 antibiotic perturbed volunteers displayed higher viral richness. We observed short-term  
119 temporal stability of all three kingdoms in healthy subjects not receiving antibiotics (Shkoporov  
120 *et al*, 2019) (**Fig. EV2**). In line with recent studies (van Hattem *et al*, 2017, 2019), we observed  
121 that a total of 30% of healthy subjects were colonized by the anaerobic gut protozoa  
122 *Blastocystis hominis* or *Dientamoeba fragilis*, yet these protozoa were undetectable following  
123 antibiotic administration (**Table EV2**).

124 In order to further understand the patterns of covariation between these intestinal communities  
125 during health and critical illness, we employed multi-omics factor analysis (MOFA), a recently  
126 developed computational framework for data integration (Argelaguet *et al*, 2018, 2019a).  
127 Briefly, MOFA performs unsupervised matrix factorisation simultaneously across multiple data  
128 modalities, thereby capturing the global sources of variability via a limited number of inferred  
129 factors, effectively yielding a compressed low-dimensional representation of the data.  
130 Importantly, the model disentangles the patterns of covariation that are shared across data  
131 modalities from the variation that is exclusive to a single data modality (Argelaguet *et al*, 2018)  
132 (**Fig. 2a**). This integrative strategy, initially developed for the analysis of single-cell assays

133 (Argelaguet *et al*, 2019b), is especially effective for the analysis of sparse readouts, including  
134 microbiome data. As input to the model, we collapsed the inferred bacterial and fungal ASVs  
135 and viral reads to their respective Family or Genus level. The number of sequences were  
136 subsequently scaled using a centralized-log ratio (Aitchison, 1982), which has shown to be  
137 effective in normalizing compositional data (Gloor *et al*, 2017). MOFA identified six Factors  
138 with a minimum explained variance of 5% (see Materials & Methods). Altogether, the latent  
139 representation explained 39% of the sample heterogeneity in bacteria, 39% for fungi and 19%  
140 for viral composition (**Fig. 2b,c**; **Fig. EV3**). Notably, Factor 1 and Factor 3 (sorted by variance  
141 explained) captured coordinated variability across all three kingdoms and were capable of  
142 completely partitioning transkingdom signatures pertaining to critical illness, antibiotic  
143 perturbation and health (**Fig. 2d**). The four remaining Factors identified sample heterogeneity  
144 related to low abundant fungal variations (Factor 2; **Fig. EV4**), fluorquinolone/cephalosporin  
145 exposure (Factor 4; **Fig. EV5**), as well as bacterial (Factor 5) and viral (Factor 6) signatures  
146 pertaining to individual ICU patients.

147 Factor 1, the major source of variation, was linked to a transkingdom signature driven by  
148 antibiotic perturbation in both health and critical illness, while being consistently absent in  
149 healthy subjects without antibiotic exposure (**Fig. 3a,b**). Specifically, bacterial taxa positively  
150 associated with this factor were facultative aerobic bacterial pathobionts that have been  
151 previously associated with critical illness (Alverdy & Krezalek, 2017; Wischmeyer *et al*, 2016;  
152 Haak *et al*, 2017), such as *Staphylococcus*, *Enterococcus*, *Klebsiella*, *Escherichia/Shigella* and  
153 *Enterobacter*. Bacterial taxa that were negatively associated with this factor consisted  
154 predominantly of genera within the obligatory anaerobic families Lachnospiraceae and  
155 Ruminococcaceae, which have been identified as markers of a healthy microbiota and are  
156 linked to colonization resistance against bacterial pathobionts (Lee *et al*, 2017; Taur *et al*,  
157 2012). Fungal taxa positively associated with this factor were characterized by yeasts capable  
158 of causing invasive disease, such as *Candida*, *Aspergillus*, and *Debaryomyces* (Miceli *et al*,  
159 2011; Beyda *et al*, 2013; Zhai *et al*, 2020), with a relative absence of the gut constituents  
160 *Filobasidium*, *Malassezia* and *Dipodascus* (Suhr & Hallen-Adams, 2015). The specific co-  
161 occurrences of fungal and bacterial taxa observed in Factor 1 are supported by previous  
162 studies. For example, members of the Lachnospiraceae family, such as *Blautia* and *Roseburia*,  
163 display a direct inhibitory effect on the growth of several *Candida* spp. and *Saccharomyces*  
164 *cerevisiae*, through the production of short-chain fatty acids (SCFAs) and other metabolites  
165 (Nguyen *et al*, 2011; García *et al*, 2017; Fan *et al*, 2015). In addition, *in vitro* studies have  
166 shown that metabolites produced by *Candida* spp. enhance the growth of *E. coli* and *S. aureus*  
167 (Huseyin *et al*, 2017; Kong *et al*, 2017), providing further indications that the intestinal  
168 transkingdom signatures identified by MOFA are biologically meaningful.

169 Factor 3 captured signatures present in healthy subjects receiving broad-spectrum antibiotics,  
170 with a predominance of the closely related Streptococcaceae family (*Streptococcus* and  
171 *Lactococcus*), Lactobacillales order (*Lactobacillus* and *Granulicatella*) and Actinomyceteles  
172 order (*Actinomyces* and *Rothia*). Interestingly, all these bacteria have been shown to possess  
173 mutualistic properties with *Candida* in oral and vaginal environments, potentially through the  
174 modification of biofilm formation (Richard & Sokol, 2019; Arzmi *et al*, 2015; Kim *et al*, 2017;  
175 Uppuluri *et al*, 2017). These observations indicate that similar fungal-bacterial interactions are  
176 potentially maintained within the gastrointestinal tract, warranting further elucidation.

177 Notably, the majority of viral sequences that were associated with Factors 1 and 3 consisted  
178 of bacteriophages that significantly correlated with the presence of the corresponding bacterial  
179 targets in the same factor (**Fig. EV6**). The expansion of aerobic bacterial species during critical  
180 illness and following antibiotics can therefore potentially facilitate the enrichment of their  
181 corresponding bacteriophages (Shkoporov & Hill, 2019; Knowles *et al*, 2016). Other notable  
182 viral interactions were the increase of the mycoviruses Chrysovirus and Partitivirus—which are  
183 capable of infecting fungi (Ghabrial *et al*, 2015)—in healthy subjects following antibiotic  
184 exposure. These findings suggest that transkingdom interactions are occurring beyond  
185 intestinal bacteria, further underscoring the complexity of relationships within the intestinal  
186 environment.

187 An important indicator of the influence of the bacterial microbiota on the fungal population in  
188 the gut is the dramatic increase in the fungal burden after antibiotic treatment (Richard & Sokol,  
189 2019). This phenomenon can partly be explained by antibiotic-induced alterations in nutrient  
190 availability, yet a loss of the direct inhibitory effects of anaerobic bacteria towards fungal  
191 expansion has also been documented (Nguyen *et al*, 2011; Fan *et al*, 2015; García *et al*, 2017).  
192 Therefore, to further explore the association between functional and absolute profiles of the  
193 bacterial microbiome and fungal expansion, we performed targeted bacterial 16S rRNA and  
194 fungal 18S rRNA quantitative PCRs to calculate intestinal fungal/bacterial ratios, and  
195 simultaneously quantified the absolute abundance of the SCFAs butyrate, acetate and  
196 propionate using Nuclear Magnetic Resonance (NMR) spectroscopy. We observed a strong  
197 depletion of SCFAs in both critical illness and following antibiotic perturbation, with the latter  
198 having the most significant impact (**Fig. 4a,b**). Notably, both conditions were associated with  
199 increased fungal/bacterial ratios, increasing as much as  $10^3$ - $10^4$  times. This decrease of  
200 SCFAs coincided with a gradient of depletion along the axis of Factors 1 and 3 (**Fig. 4c**).  
201 Finally, we observed that absolute faecal SCFA concentrations were inversely correlated with  
202 absolute fungal copies, with propionate levels displaying the strongest correlation ( $r=0.75$ ;  $p$   
203  $<0.0001$ , **Fig. 4d**). These data suggest that fungal expansion not only occurs in the context of

204 decreased absolute bacterial abundance, but is also dependent on altered functions of the  
205 remaining bacterial communities in the intestinal environment.

206 In conclusion, our findings shed light into the dynamics and shared variations between  
207 kingdoms following broad-spectrum antibiotic modulation and critical illness. The short- and  
208 long-term impact of these disruptions will be an important focus of future investigations.

209

210

211

212

213

214

215

216

217

218

219

220

221

222

223

224

225

226

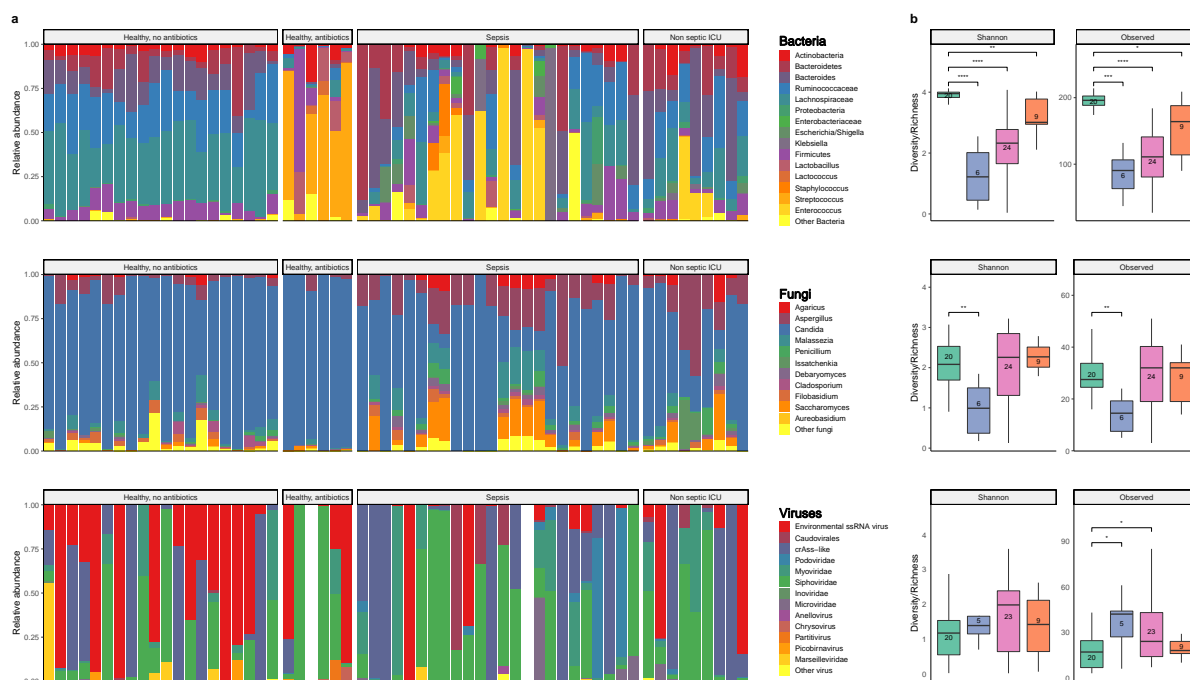

**Figure 1: Overview of the composition and diversity of the bacterial, fungal and viral microbiome.**

(a) Relative proportion of sequence reads at the Genus level assigned to different bacterial and fungal taxa and Order level for viral taxa. Viral metagenomics of two samples did not pass quality control due to high background levels, and were therefore excluded from further analysis. A subset of the bacterial 16S rRNA sequencing data has been previously reported.<sup>25,31</sup>

(b) Alpha diversity metrics of bacteria (top), fungi (middle) and viruses (bottom), using the Shannon Diversity Index (Shannon) and Observed Taxa richness index (Observed). In the box plots, the central rectangle spans the first quartile to the third quartile (the interquartile range or IQR), the central line inside the rectangle shows the median, and whiskers above and below the box. Given the non-parametric nature of the data, p values were calculated using the Wilcoxon rank sum test.



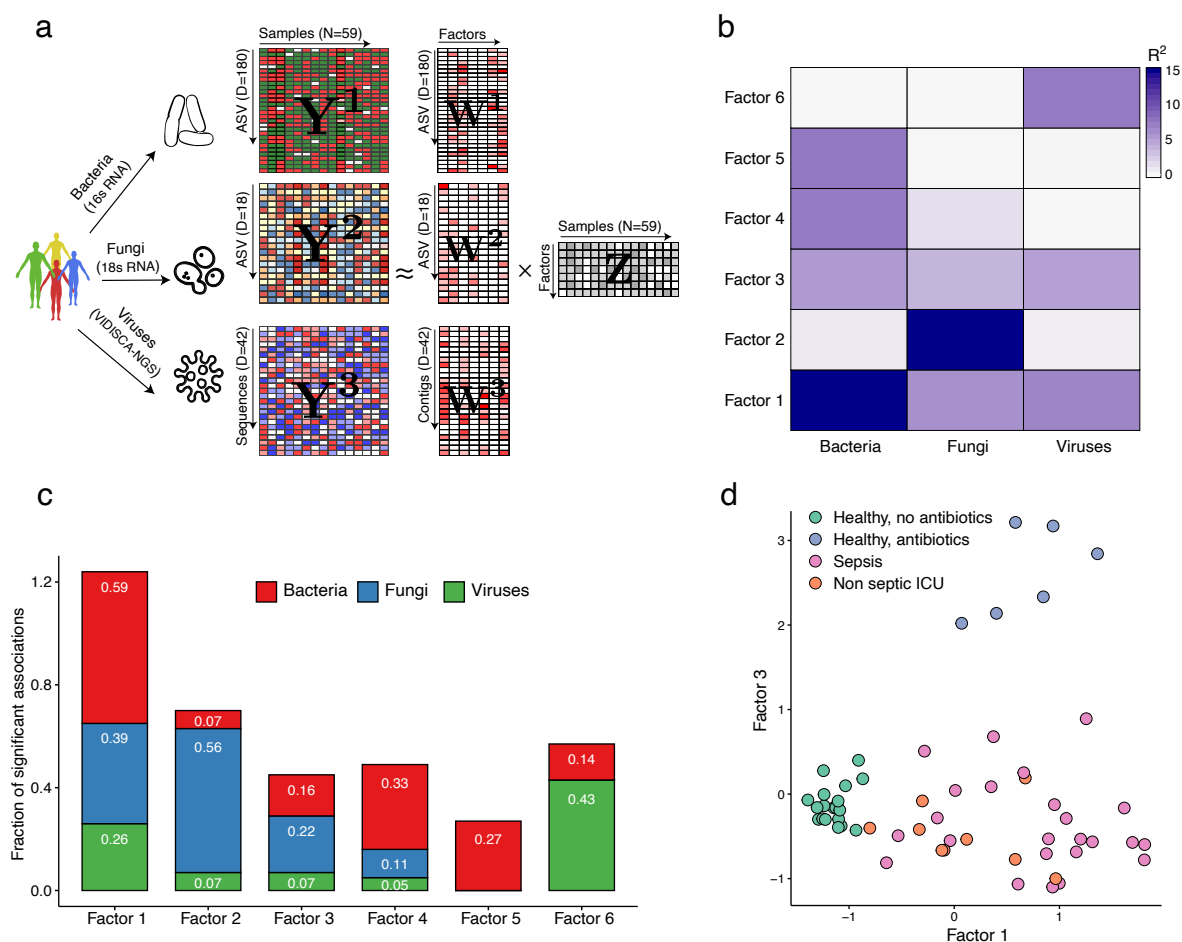

**Figure 2: Multi-Omics Factor Analysis (MOFA) delineates the sources of cross-kingdom heterogeneity in the cohort.**

(a) Model overview: MOFA takes as input the three microbiome quantification matrices. MOFA exploits the covariation patterns between the features within and between microbiome modalities to learn a low-dimensional representation of the data in terms of a small number of latent Factors ( $Z$  matrix) and three different weight matrices ( $W$ , one per kingdom). By maximising the variance explained under sparsity assumptions, 11,12 MOFA provides a principled way to discover the global sources of variability in the data. For each latent Factor (i.e. each source of variation), the weights provide a measure of feature importance for every feature in each Factor, hence enabling the interpretation the variation captured by every factor.

(b) Heatmap displays the percentage of variance explained ( $R^2$ ) by each Factor (rows) across the three microbe modalities (columns). Factors 1 and 3 capture coordinated variation across all three microbiome modalities, whereas Factor 2, 4 and 5 are mostly dominated by heterogeneity in Fungi composition.

(c) Bar plots show the fraction of significant associations between the features of each microbiome modality and each factor. P-values are obtained using a t-test based on the Pearson's product moment correlation coefficient. Statistical significance is called at 10% FDR. This plot is useful to interpret whether the variance explained values displayed in (b) are driven by a strong change in a small number of features, or by a moderate effect across a large range of features.

(d) Scatter plot of Factor 1 (x-axis) versus Factor 3 (y-axis). Each dot represents a sample, coloured by condition. Factor 1 captures the gradient in microbiome variation associated with antibiotic treatment and critical illness (from negative to positive Factor values), whereas Factor 3 captures the variation associated with antibiotic treatment in healthy patients (positive Factor 3 values) versus critically ill patients (negative Factor 3 values).

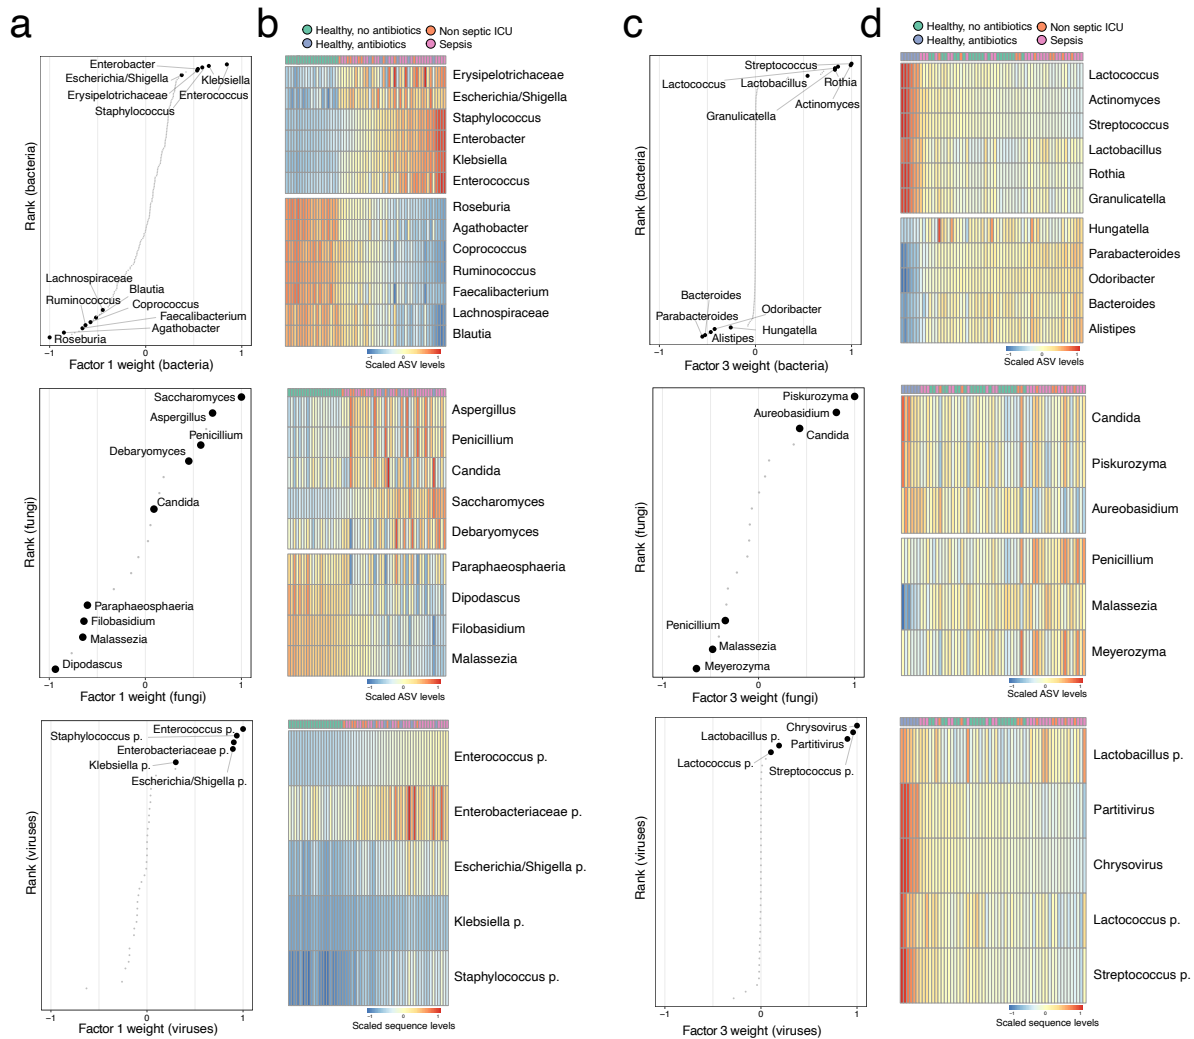

**Figure 3: Characterisation of the transkingdom variation captured by Factor 1 and Factor 3.**

(a) Scatter plots display the distribution of Bacterial (top), Fungi (middle) and Viruses (bottom) weights for Factor 1. A positive value indicates a positive association with Factor 1 values, whereas a negative value indicates a negative association with Factor 1 values (see Fig 2d). The larger the absolute value of the weight, the stronger the association. For ease of visualisation, weights are scaled from -1 to 1. Representative taxa among the top weights are labeled.

(b) Heat maps display the reconstructed data (see Methods) based on the MOFA model for the taxa highlighted in (a). Samples are shown in the columns and features in the rows.

(c) Scatter plots display the distribution of Bacterial (top), Fungi (middle) and Viruses (bottom) weights for Factor 3. A positive value indicates a positive association with Factor 3 values, whereas a negative value indicates a negative association with Factor 3 values (see Fig 2d). The larger the absolute value of the weight, the stronger the association. For ease of visualisation, weights are scaled from -1 to 1. Representative taxa among the top weights are labeled.

(d) Heat maps display the (denoised) data reconstruction (see Methods) based on the MOFA model for the taxa highlighted in (c). Samples are shown in the columns and features in the rows.

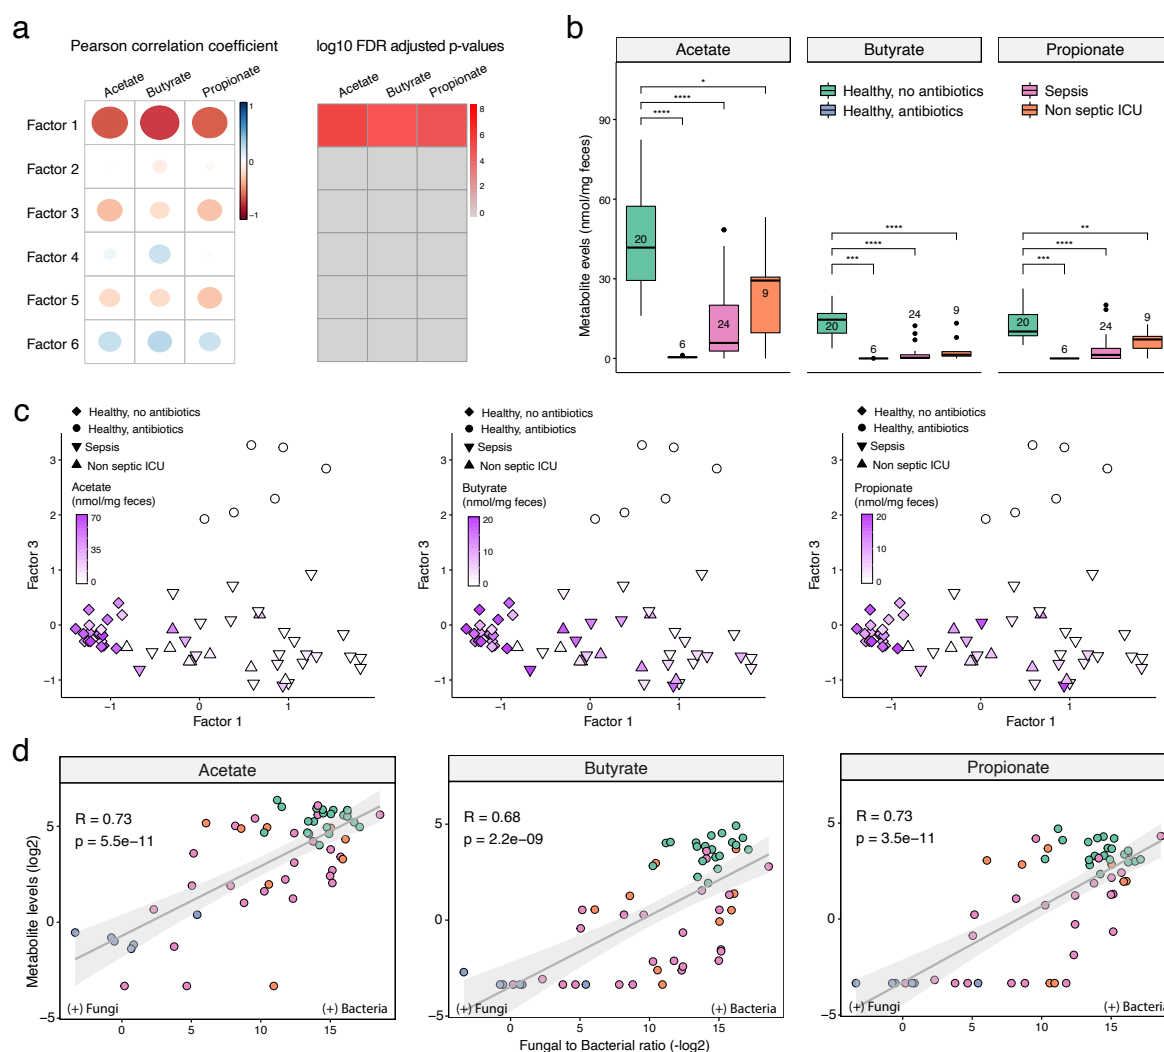

**Figure 4: Correlation of total bacterial and fungal load with fecal levels of short-chain fatty acids in health and critical illness.**

(a) Association analysis between Factor values and SCFA levels. Left panel displays the Pearson correlation coefficient between factor values and the levels of three types of SCFA: butyrate, acetate and propionate. Right panel displays the corresponding FDR-adjusted and log-transformed p-values.

(b) Box plots showing the SCFA concentrations (in mg per mg of feces, y-axis) per sample group (x-axis). In the box plots, the central rectangle spans the first quartile to the third quartile (the interquartile range or IQR), the central line inside the rectangle shows the median, and whiskers above and below the box. Given the non-parametric nature of the data, p values were calculated using the Wilcoxon rank sum test.

(c) Scatter plot of Factor 1 (x-axis) versus Factor 3 (y-axis) values. Each dot represents a sample, shaped by the sample group and coloured by SCFA concentrations (in mg per mg of feces). (d) Scatter plot of Fungal-to-Bacterial absolute levels ratio (after log<sub>10</sub> transformation, x-axis) versus SCFA concentrations (after log<sub>2</sub> transformation, y-axis). The line represents the linear regression fit and the shade the corresponding 95% confidence interval. Corresponding Pearson correlation coefficients and p-values are also displayed in the top left corner.

## 227 **Materials and Methods**

### 228 **Study design and participants**

229 Patients were recruited as part of a large prospective observational study in critically ill patients  
230 admitted to the ICU (Molecular Diagnosis and Risk Stratification of Sepsis (MARS) study;  
231 [clinicaltrials.gov](https://clinicaltrials.gov) identifier NCT01905033) (van Vught *et al*, 2016; Lankelma *et al*, 2017b). A  
232 total of 33 randomly selected adult patients who were admitted to the ICU of the Academic  
233 Medical Centre (Amsterdam, The Netherlands) between October 2012 and November 2013  
234 were included. Patients who were transferred from other ICUs or had an expected length of  
235 ICU stay of <24 h were excluded. All patients met at least two of the following criteria: body  
236 temperature of  $\leq 36$  or  $\geq 38$  °C, tachycardia of  $>90$  /min, tachypnoea of  $>20$  /min or partial  
237 pressure of carbon dioxide (pCO<sub>2</sub>) of  $< 4.3$  kPA, and leukocyte count of  $<4 \times 10^9/L$  or  $>12 \times$   
238  $10^9/L$ . Sepsis was defined when the inclusion criteria were associated with suspected  
239 infection within 24 hours after ICU admission, with subsequent systemic therapeutic  
240 administration of antibiotics to the patient (Lankelma *et al*, 2017b). The control group consisted  
241 of 13 healthy, non-smoking human subjects who had not taken antibiotics during the previous  
242 year ([clinicaltrials.gov](https://clinicaltrials.gov) identifier NCT02127749) (Haak *et al*, 2019; Lankelma *et al*, 2017a). Six  
243 healthy subjects received oral broad-spectrum antibiotics (ciprofloxacin 500 mg q12h,  
244 vancomycin 500 mg q8h and metronidazole 500 mg q8h) for seven days. Subjects were asked  
245 to collect faecal samples before antibiotic treatment and one day after the 7-day course of  
246 antibiotics. Fresh stool samples by ICU patients were stored at 4 °C and transferred to -80 °C  
247 within 24 hours of collection. Faecal samples by healthy subjects were collected in plastic  
248 containers, stored at -20 °C at home and were transported to the study centre for storage at  
249 -80 °C within 24 hours. Written informed consent was obtained from all healthy subjects and  
250 patients or their legal representative. Ethical approval for both the patient and healthy subject  
251 studies was received from the Medical Ethics Committee of the Academic Medical Centre in  
252 Amsterdam, and all research was conducted in accordance with the declaration of Helsinki.

253

### 254 **Bacterial and fungal microbiota sequencing**

255 Faecal DNA was extracted and purified using a combination of repeated bead-beating (method  
256 5) (Costea *et al*, 2017) and the Maxwell 16 Tissue LEV Total RNA Purification Kit (Promega,  
257 Maddison, WI, USA), with STAR (Stool transport and recovery) buffer (Roche, Basel  
258 Switzerland). Negative extraction controls (DNA-free water) were processed in a similar  
259 manner.

260 Twenty nanograms of DNA was used for the amplification of the bacterial 16S rRNA gene with  
261 V3-V4 341F forward and 805R reverse for 25 cycles. The PCR was performed in a total volume  
262 of 30 µl containing 1× HF buffer (Thermo Fisher Scientific, Waltham, MA, USA ), 1 µl dNTP  
263 Mix (10 mM; Promega, Leiden, the Netherlands), 1 U of Phusion Green High-Fidelity DNA  
264 Polymerase (Thermo Fisher Scientific, Waltham, MA, USA), 500 nM of the forward 8-nt  
265 sample-specific barcode primer containing the Illumina adapter, pad and link (341F (5'-  
266 CCTACGGGNGGCWGCAG-3')) 500 nM of reverse 8-nt sample-specific barcode primer  
267 containing the Illumina adapter, pad and link (805R (5' GACTACHVGGGTATCTAATCC-3'))  
268 20 ng/µl of template DNA and nuclease free water. The amplification program was as follows:  
269 initial denaturation at 98 °C for 30 s; 25 cycles of denaturation at 98 °C for 10 s, annealing at  
270 55 °C for 20 s, elongation at 72 °C for 90 s; and an extension at 72 °C for 10 min (Kozich *et al*,  
271 2013). The size of the PCR products (~540 bp) was confirmed by gel electrophoresis using 4  
272 µl of the amplification reaction mixture on a 1% (w/v) agarose gel containing ethidium bromide  
273 (AppliChem GmbH, Darmstadt (Germany)).

274 Fungal composition was determined by ITS1 amplicon sequence analysis. PCR generated  
275 amplicon libraries were obtained from 100 ng faecal DNA using the ITS1 primer set containing  
276 an overhang for the Illumina Nextera platform [forward] 5'-  
277 TCGTCGGCAGCGTCAGATGTGTATAAGAGACAGCTTGGTCATTTAGAGGAAGTAA and  
278 [reverse] 5'-  
279 GTCTCGTGGGCTCGGAGATGTGTATAAGAGACAGGCTGCGTTCTTCATCGATGC  
280 primers and Phusion High Fidelity DNA Polymerase (Thermo Fisher Scientific, Waltham, MA,  
281 USA). A duplicate reaction in 20 µl was performed with following thermocycling conditions:  
282 initial denaturation at 98 °C for 1 min followed by 35 cycles denaturation (20 s), annealing (20  
283 s at 58 °C) and extension (60 s at 72°C) and final extension at 72 °C for 5 min. The duplicates  
284 were pooled to a final volume of 40 µl. The PCR products were purified with AMPure XP beads  
285 (Beckman Coulter, Brea, CA, USA) and taken into 15 µl DNA-free water. A second  
286 amplification step was used to introduce multiplex indices and Illumina sequencing adapters  
287 using the Kapa polymerase system. A 24-cycle amplification reaction in 40 µl was performed  
288 with following conditions: initial denaturation at 95 °C for 3 min followed by denaturation (20s  
289 at 98 °C), annealing (20 s at 60 °C) and extension (60 s at 72 °C) and final extension at 72 °C  
290 for 5 min.

291 Bacterial and fungal PCR products were purified using AMPure XP beads (Beckman Coulter,  
292 Brea, CA, USA). Amplicon DNA concentration was measured with the Qubit fluorometric  
293 Quantitation method (Thermo Fisher Scientific, Waltham, MA, USA) and DNA quality was  
294 determined with the Agilent Bioanalyzer DNA-1000 chip, after which the purified products were

295 equimolarly pooled. The libraries were sequenced using an Illumina MiSeq platform  
296 (GATC Biotech, Konstanz, Germany) using V3 chemistry with 2 × 251 cycles. Forward and  
297 reverse reads were truncated to 240 and 210 bases respectively and merged using USEARCH  
298 (Edgar, 2010). Merged reads that did not pass the Illumina chastity filter, had an expected error  
299 rate higher than 2, or were shorter than 380 bases were filtered. Amplified Sequence Variants  
300 (ASVs) were inferred for each sample individually with a minimum abundance of 4 reads  
301 (Callahan *et al*, 2016). Unfiltered reads were then mapped against the collective ASV set to  
302 determine the abundances. Bacterial taxonomy was assigned using the RDP classifier (Wang  
303 *et al*, 2007) and SILVA 16S ribosomal database V132 (Quast *et al*, 2013). Fungal taxonomy  
304 was assigned using the UNITE database (Nilsson *et al*, 2019).

### 305 **Viral microbiota sequencing and analysis**

306 The collected faecal suspension was centrifuged to pellet cells and debris, and nucleic acids  
307 in the supernatant were extracted using the Boom method (Boom *et al*, 1990), followed by  
308 reverse transcription with non-ribosomal random hexamers (Endoh *et al*, 2005) and second  
309 strand synthesis. DNA was digested with MseI (T<sup>^</sup>TAA; New England Biolabs, Ipswich, MA,  
310 USA) and ligated to adapters containing a sample identifier sequence. Next, size selection with  
311 AMPure XP beads (Beckman Coulter, Brea, CA, USA) was performed to remove small DNA  
312 fragments prior to a 28-cycle PCR using adaptor-annealing primers. Small and large size  
313 selection was performed with AMPure XP beads to select DNA-strands with a length ranging  
314 between 150 and 550 nucleotides. Libraries were analysed using the Bioanalyzer (High  
315 Sensitivity Kit, Agilent Genomics, Santa Clara, CA, USA) and Qubit (dsDNA HS Assay Kit,  
316 Thermo Fisher Scientific, Waltham, MA, USA) instruments to quantify DNA length and  
317 concentration, respectively. Sample libraries were pooled at the equimolar concentration. In  
318 total, 50 pmol DNA of the pool was clonally amplified on beads using the Ion Chef System  
319 (Thermo Fisher Scientific, Waltham, MA, USA) and sequencing was performed on the Ion  
320 PGM™ System (Thermo Fisher Scientific, Waltham, MA, USA) with the ION 316 Chip (400 bp  
321 read length and 2 million sequences expected per run).

322 VIDISCA-NGS reads were aligned using BWA-MEM (Li, 2013) to a reference database  
323 consisting of the human reference genome (hg38), the SILVA SSU V132 database (Quast *et al*  
324 *et al*, 2013)qu, and all RefSeq viral genomes (downloaded in September 2019). Mapping outputs  
325 were further processed using the PathoID module of PathoScope 2.0 (Hong *et al*, 2014; Byrd  
326 *et al*, 2014), to reassign reads with multiple alignments to their most likely target. Viral  
327 candidates were aligned back to the reference database with BLASTn, and those aligning at  
328 ≥95% for 100 bp were retained as hits. To ensure that all known eukaryotic viruses were  
329 detected with this approach, all reads that remained unmapped in the BWA-MEM step were

330 analysed with a separate virus discovery bioinformatic pipeline, described in detail elsewhere  
331 (Kinsella *et al*, 2019). Briefly, rRNA reads were identified with SortMeRNA v2.1, non-rRNA  
332 reads were made non-redundant using CD-HIT v4.7, and these were queried against a  
333 eukaryotic virus protein database using the UBLAST algorithm provided as part of the  
334 USEARCH v10 software package (Edgar, 2010). Reads with a significant alignment to a viral  
335 protein were subsequently aligned to the non-redundant nucleotides database using BLASTn.  
336 Those with a best hit to a viral sequence were regarded as confidently viral, those not aligning  
337 to any sequences were regarded as putatively viral, while those with a non-viral best hit were  
338 regarded as false positives.

### 339 **Targeted measurement of intestinal protozoa**

340 Automated nucleic acid extraction was performed on the MagNA Pure 96 instrument (Roche  
341 Applied Science, the Netherlands) according to the manufacturer's protocol. DNA was eluted  
342 in 100 µl elution buffer (Roche Applied Science). Phocine Herpes Virus (PhoHV) DNA was  
343 added to all samples as an internal control for extraction and amplification efficiency. Presence  
344 of *Giardia lamblia*, *Cryptosporidium parvum*, *Entamoeba histolytica*, *Blastocystis hominis* and  
345 *Dientamoeba fragilis* was assessed by real-time PCR targeting the small subunit ribosomal  
346 RNA gene (SSU-rDNA) (van Hattem *et al*, 2019). Positive controls consisting of a plasmid  
347 containing the target sequence were included in every run, as well as negative extraction  
348 controls and negative PCR controls. Subjects were excluded from further analyses if internal  
349 controls tested negative in one or more samples.

### 350 **Targeted measurement of short-chain fatty acids**

351 Sample preparation of faecal extracts and Nuclear Magnetic Resonance (NMR) spectroscopy  
352 for quantification of SCFAs was performed as described in Kim HK *et al* (Kim *et al*, 2018), with  
353 some modifications. Briefly, aqueous extracts of faeces were prepared by mixing 50-100 mg  
354 of faeces and 0.3 mL of deionized water, followed by mechanical homogenization in a Bullet  
355 Blender 24 (Next Avance Inc, Troy, NY, USA). The faecal slurry was centrifuged twice at 18213  
356 × g for 10 min at 4 °C and 0.225 mL of the supernatant was mixed with 0.025 mL 1.5 M  
357 potassium phosphate buffer (pH 7.4) containing 2 mM sodium azide and 4 mM sodium  
358 trimethylsilyl-propionate-d4 (TSP-d4) in D<sub>2</sub>O. For each sample, one 1D <sup>1</sup>H-NMR spectrum was  
359 acquired in a 14.1 T Avance II NMR (Bruker Biospin Ltd, Karlsruhe, Germany). Quantification  
360 of SCFAs from the NMR spectra was performed in ChenomX (Chenomx NMR suite 8.4) using  
361 the known concentration of TSP-d4.

### 362 **Quantitative PCR for bacterial and fungal load.**

363 For the measurement of total bacterial content in faecal samples, we used the method as  
364 reported by Nadkarni and colleagues (Nadkarni *et al*, 2002), with modifications. Briefly, we  
365 used a primer concentration of 500 nM in a final volume of 10  $\mu$ l with the SensiFast SYBR No-  
366 ROX Kit (Bioline, London, UK). The amplification conditions were as follows: initial  
367 denaturation at 95 °C for 5 s followed by denaturation (10 s at 95 °C) - annealing (10 s at 66  
368 °C) - extension (20 s at 72 °C) for 44 repetitive cycles in a BioRad CFX96 thermocycler  
369 (Hercules, CA, USA). The primerset of FungiQuant (Liu *et al*, 2012) was used for fungal load  
370 determination, with modifications. The final PCR primer concentration was 500 nM in a volume  
371 of 10  $\mu$ l with the SensiFast SYBR No-ROX Kit (Bioline, London, UK). The following  
372 amplification program was used: initial denaturation at 95 °C for 5 s min followed by  
373 denaturation (10 s at 95 °C) annealing (10 s at 60 °C) and extension (20 s at 72 °C) in 44  
374 repetitive cycles in a BioRad CFX96 thermocycler (Hercules, CA, USA). Following  
375 amplification, fungal and bacterial ratios were calculated using LinRegPCR (Ruijter *et al*, 2009).

### 376 **Multi-Omics Factor Analysis (MOFA)**

377 The input to MOFA is a list of matrices with matching samples, where each matrix represents  
378 a different data modality. Bacterial 16S rRNA ASVs, fungal ITS1 rRNA ASVs and viral  
379 sequences were defined as separate data modalities. As a filtering criterion, bacterial and  
380 fungal features were required to have a minimum of 10 ASVs observed in at least 25% of the  
381 dataset. In addition, to mitigate the sparsity of the data and to simplify the interpretation, we  
382 collapsed the inferred bacterial and fungal ASVs and viral sequences to their respective Family  
383 or Genus level. The number of sequences were subsequently scaled using a centralized-log-  
384 ratio (Aitchison, 1982), which has shown to be effective in normalizing compositional data  
385 (Gloor *et al*, 2017).

386 Model inference is performed using variational Bayesian inference with mean-field assumption  
387 (Argelaguet *et al*, 2018). The resulting optimisation problem consists of an objective function  
388 that maximises the data likelihoods (i.e. the variance explained) under some sparsity  
389 assumptions (Argelaguet *et al*, 2019b) which yields a more interpretable model output.

390 After model fitting, the number of factors was estimated by requiring a minimum of 5% variance  
391 explained across all microbiome modalities. The downstream characterization of the model  
392 output included several analyses:

- 393 • Variance decomposition: quantification of the fraction of variance explained ( $R_2$ ) by  
394 each factor in each view, using a coefficient of determination (Argelaguet *et al*, 2019b,  
395 2018, 2019a).



- 396
- Visualization of weights: the model learns a weight for every feature in each factor, 397 which can be interpreted as a measure of feature importance. Larger weights (in 398 absolute value) indicate higher correlation with the corresponding factor values. The 399 sign of the weight indicates the directionality of the variation: features with positive 400 weights are positively associated with the corresponding values, whereas features with 401 negative weights are negatively associated with the corresponding values.
  - Visualization of factors: each MOFA factor captures a different dimension of 402 heterogeneity in the microbiome composition. Mathematically, each factor ordines 403 cells along a one-dimensional axis centred at zero. Samples with different signs 404 manifest opposite phenotypes along the inferred axis of variation, with higher absolute 405 value indicating a stronger effect. Note that the interpretation of factors is analogous to 406 the interpretation of the principal components in PCA.
  - Data reconstruction: MOFA generates a compressed low-dimensional representation 407 of the data. By taking the product of the factors and the weights, the model can 408 reconstruct a normally-distributed denoised representation of the input data. This is 409 particularly useful for the visualisation of sparse readouts. 410 411

## 412 **Statistics**

413 All analyses were performed in the R statistical framework (Vienna Austria, version 3.6.1). To 414 assess alpha diversity and richness, we calculated the Shannon Diversity Index and Observed 415 Taxa Richness index with the phyloseq package<sup>17</sup>. Data were not normally distributed and are 416 therefore presented as median and interquartile range (IQR), while data were analysed using 417 a Wilcoxon rank-sum test. Associations between Factor values and covariates were analysed 418 using linear regression by Pearson correlation coefficients. Statistical significance is called at 419 10% FDR.

420

## 421 **Data availability**

422 Raw sequencing data (bacterial and fungal ASVs, VIDISCA-NGS sequencing reads) will be 423 submitted to the European Nucleotide Archive (ENA; accession number PRJEB37289) prior 424 to publication. All code used for analysis is available at 425 [https://github.com/bwhaak/MOFA\\_microbiome](https://github.com/bwhaak/MOFA_microbiome). Links to the processed data are included in the 426 GitHub repository.

427

## 428 **Acknowledgements**

429 The authors acknowledge Lonneke A. van Vught, Maryse A. Wiewel, Friso M. de Beer, Lieuwe  
430 D.J. Bos, Gerie J. Glas, Roosmarijn T.M. van Hooijdonk, Michaëla A.M. Huson, Laura R.A.  
431 Schouten, Marleen Straat, Esther Witteveen, and Luuk Wieske (Department of Intensive Care,  
432 Amsterdam UMC, Location Academic Medical Center, the Netherlands) for their participation  
433 in data collection. The authors would also like to thank Jorn Hartman, Michelle Klein, Martin  
434 Deijns, Maarten Jebbink, Patricia Broekhuizen – van Haaften and Ellen Wentink – Bonnema for  
435 their indispensable help in the laboratory work on the faecal samples. This work was supported  
436 by the Netherlands Organization for Scientific Research (NWO; Vidi Grant 91716475).

## 437 **Author contributions**

438 BWH and WJW conceived the original study. RA performed the MOFA+ analysis. CMK and  
439 CMvdH designed and performed the viral sequencing and bioinformatics pipeline. SK and MG  
440 designed and performed the NMR analyses. Fungal profiling and sequencing was designed  
441 and performed by WdJ and TBMH. Protozoal analysis was overseen by TG. Microbiome  
442 sequencing and initial analysis was performed and facilitated by RFK, FH and WMdV. MS and  
443 TvdP oversaw sample collection on the ICU, JML oversaw sample collection of the healthy  
444 subjects. BWH, RFK and RA analysed the data, wrote the original manuscript, and prepared  
445 the final figures. CMvdH and WJW secured funding for this project. All authors have seen and  
446 approved the final version of the manuscript.

## 447 **Conflict of interest**

448 The authors declare no conflicts of interest

449 **References**

- 450 Agudelo-Ochoa GM, Valdés-Duque BE, Giraldo-Giraldo NA, Jaillier-Ramírez AM, Giraldo-  
451 Villa A, Acevedo-Castaño I, Yepes-Molina MA, Barbosa-Barbosa J & Benítez-Paéz A  
452 (2020) Gut microbiota profiles in critically ill patients, potential biomarkers and risk  
453 variables for sepsis. *Gut Microbes*: 1–16 Available at:  
454 <https://www.tandfonline.com/doi/full/10.1080/19490976.2019.1707610>
- 455 Aitchison J (1982) The Statistical Analysis of Compositional Data. *J. R. Stat. Soc. Ser. B* **44**:  
456 139–160 Available at: <http://doi.wiley.com/10.1111/j.2517-6161.1982.tb01195.x>
- 457 Alverdy JC & Krezalek MA (2017) Collapse of the Microbiome, Emergence of the  
458 Pathobiome, and the Immunopathology of Sepsis. *Crit. Care Med.* **45**: 337–347  
459 Available at: <http://journals.lww.com/00003246-201702000-00023>
- 460 Argelaguet R, Arnol D, Bredikhin D, Deloro Y, Velten B, Marioni JC & Stegle O (2019a)  
461 MOFA+: a probabilistic framework for comprehensive integration of structured single-  
462 cell data. *bioRxiv*: 837104 Available at:  
463 <https://www.biorxiv.org/content/10.1101/837104v1>
- 464 Argelaguet R, Clark SJ, Mohammed H, Stapel LC, Krueger C, Kapourani C-A, Imaz-  
465 Rosshandler I, Lohoff T, Xiang Y, Hanna CW, Smallwood S, Ibarra-Soria X, Buettner F,  
466 Sanguinetti G, Xie W, Krueger F, Göttgens B, Rugg-Gunn PJ, Kelsey G, Dean W, et al  
467 (2019b) Multi-omics profiling of mouse gastrulation at single-cell resolution. *Nature*  
468 Available at: <http://www.ncbi.nlm.nih.gov/pubmed/31827285>
- 469 Argelaguet R, Velten B, Arnol D, Dietrich S, Zenz T, Marioni JC, Buettner F, Huber W &  
470 Stegle O (2018) Multi-Omics Factor Analysis—a framework for unsupervised integration  
471 of multi-omics data sets. *Mol. Syst. Biol.* **14**: 1–13 Available at:  
472 <https://www.ncbi.nlm.nih.gov/pubmed/29925568>
- 473 Arzmi MH, Dashper S, Catmull D, Cirillo N, Reynolds EC & McCullough M (2015)  
474 Coaggregation of *Candida albicans*, *Actinomyces naeslundii* and *Streptococcus mutans*  
475 is *Candida albicans* strain dependent. *FEMS Yeast Res.* **15**:
- 476 Belkaid Y & Hand TW (2014) Role of the microbiota in immunity and inflammation. *Cell* **157**:  
477 121–141 Available at: <http://dx.doi.org/10.1016/j.cell.2014.03.011>
- 478 Beyda ND, Chuang SH, Alam MJ, Shah DN, Ng TM, McCaskey L & Garey KW (2013)  
479 Treatment of *Candida famata* bloodstream infections: case series and review of the

- 480 literature. *J. Antimicrob. Chemother.* **68**: 438–443 Available at:  
481 <https://academic.oup.com/jac/article-lookup/doi/10.1093/jac/dks388>
- 482 Boom R, Sol CJ, Salimans MM, Jansen CL, Wertheim-van Dillen PM & van der Noordaa J  
483 (1990) Rapid and simple method for purification of nucleic acids. *J. Clin. Microbiol.* **28**:  
484 495–503 Available at: <http://www.ncbi.nlm.nih.gov/pubmed/1691208>
- 485 Botschuijver S, Roeselers G, Levin E, Jonkers DM, Welting O, Heinsbroek SEM, de Weerd  
486 HH, Boekhout T, Fornai M, Masclee AA, Schuren FHJ, de Jonge WJ, Seppen J & van  
487 den Wijngaard RM (2017) Intestinal Fungal Dysbiosis Is Associated With Visceral  
488 Hypersensitivity in Patients With Irritable Bowel Syndrome and Rats. *Gastroenterology*  
489 **153**: 1026–1039
- 490 Buffie CG & Pamer EG (2013) Microbiota-mediated colonization resistance against intestinal  
491 pathogens. *Nat Rev Immunol* **13**: 790–801 Available at:  
492 <http://www.ncbi.nlm.nih.gov/pubmed/24096337>
- 493 Byrd AL, Perez-Rogers JF, Manimaran S, Castro-Nallar E, Toma I, McCaffrey T, Siegel M,  
494 Benson G, Crandall KA & Johnson WE (2014) Clinical PathoScope: Rapid alignment  
495 and filtration for accurate pathogen identification in clinical samples using unassembled  
496 sequencing data. *BMC Bioinformatics* **15**: 1–14
- 497 Callahan BJ, McMurdie PJ, Rosen MJ, Han AW, Johnson AJA & Holmes SP (2016) DADA2:  
498 High-resolution sample inference from Illumina amplicon data. *Nat. Methods* **13**: 581–  
499 583 Available at: <http://www.nature.com/articles/nmeth.3869>
- 500 Clarke TB, Davis KM, Lysenko ES, Zhou AY, Yu Y & Weiser JN (2010) Recognition of  
501 peptidoglycan from the microbiota by Nod1 enhances systemic innate immunity. *Nat.*  
502 *Med.* **16**: 228–31 Available at: <http://dx.doi.org/10.1038/nm.2087>
- 503 Costea PI, Zeller G, Sunagawa S, Pelletier E, Alberti A, Levenez F, Tramontano M, Driessen  
504 M, Hercog R, Jung F-E, Kultima JR, Hayward MR, Coelho LP, Allen-Vercoe E, Bertrand  
505 L, Blaut M, Brown JRM, Carton T, Cools-Portier S, Daigneault M, et al (2017) Towards  
506 standards for human fecal sample processing in metagenomic studies. *Nat. Biotechnol.*  
507 **35**: 1069–1076 Available at: <http://www.nature.com/articles/nbt.3960>
- 508 Dutilh BE, Cassman N, McNair K, Sanchez SE, Silva GGZ, Boling L, Barr JJ, Speth DR,  
509 Seguritan V, Aziz RK, Felts B, Dinsdale EA, Mokili JL & Edwards RA (2014) A highly  
510 abundant bacteriophage discovered in the unknown sequences of human faecal  
511 metagenomes. *Nat. Commun.* **5**: 1–11 Available at:

- 512 <https://www.ncbi.nlm.nih.gov/pubmed/25058116>
- 513 Edgar RC (2010) Search and clustering orders of magnitude faster than BLAST.  
514 *Bioinformatics* **26**: 2460–2461 Available at:  
515 [https://academic.oup.com/bioinformatics/article-](https://academic.oup.com/bioinformatics/article-lookup/doi/10.1093/bioinformatics/btq461)  
516 [lookup/doi/10.1093/bioinformatics/btq461](https://academic.oup.com/bioinformatics/article-lookup/doi/10.1093/bioinformatics/btq461)
- 517 Edridge AWD, Deijis M, Van Zeggeren IE, Kinsella CM, Jebbink MF, Bakker M, Van de Beek  
518 D, Brouwer MC & Van der Hoek L (2019) Viral metagenomics on cerebrospinal fluid.  
519 *Genes (Basel)*. **10**:
- 520 Endoh D, Mizutani T, Kirisawa R, Maki Y, Saito H, Kon Y, Morikawa S & Hayashi M (2005)  
521 Species-independent detection of RNA virus by representational difference analysis  
522 using non-ribosomal hexanucleotides for reverse transcription. *Nucleic Acids Res.* **33**:  
523 e65 Available at: <https://academic.oup.com/nar/article-lookup/doi/10.1093/nar/gni064>
- 524 Fan D, Coughlin LA, Neubauer MM, Kim J, Kim MS, Zhan X, Simms-Waldrip TR, Xie Y,  
525 Hooper L V & Koh AY (2015) Activation of HIF-1 $\alpha$  and LL-37 by commensal bacteria  
526 inhibits *Candida albicans* colonization. *Nat. Med.* **21**: 808–814 Available at:  
527 <http://www.nature.com/articles/nm.3871>
- 528 García C, Tebbji F, Daigneault M, Liu N-N, Köhler JR, Allen-Vercoe E & Sellam A (2017) The  
529 Human Gut Microbial Metabolome Modulates Fungal Growth via the TOR Signaling  
530 Pathway. *mSphere* **2**: 1–15
- 531 Ghabrial SA, Castón JR, Jiang D, Nibert ML & Suzuki N (2015) 50-plus years of fungal  
532 viruses. *Virology* **479–480**: 356–368
- 533 Gloor GB, Macklaim JM, Pawlowsky-Glahn V & Egozcue JJ (2017) Microbiome datasets are  
534 compositional: And this is not optional. *Front. Microbiol.* **8**: 1–6
- 535 Haak BW, Lankelma JM, Hugenholtz F, Belzer C, De Vos WM & Wiersinga WJ (2019) Long-  
536 term impact of oral vancomycin, ciprofloxacin and metronidazole on the gut microbiota  
537 in healthy humans. *J. Antimicrob. Chemother.* **74**: 782–786 Available at:  
538 <https://www.ncbi.nlm.nih.gov/pubmed/30418539>
- 539 Haak BW, Levi M & Wiersinga WJ (2017) Microbiota-targeted therapies on the intensive care  
540 unit. *Curr. Opin. Crit. Care* **23**: 167–174 Available at:  
541 <https://www.ncbi.nlm.nih.gov/pubmed/28092309>

- 542 Haak BW & Wiersinga WJ (2017) The role of the gut microbiota in sepsis. *Lancet*  
543 *Gastroenterol. Hepatol.* **2**: 135–143
- 544 Hallen-adams HE & Suhr MJ (2017) Fungi in the healthy human gastrointestinal tract.  
545 *Virulence* **8**: 352–358 Available at: <http://dx.doi.org/10.1080/21505594.2016.1247140>
- 546 van Hattem JM, Arcilla MS, Grobusch MP, Bart A, Bootsma MC, van Genderen PJ, van Gool  
547 T, Goorhuis A, van Hellemond JJ, Molenkamp R, Molhoek N, Oude Lashof AM,  
548 Stobberingh EE, de Wever B, Verbrugh HA, Melles DC, Penders J, Schultsz C & de  
549 Jong MD (2017) Travel-related acquisition of diarrhoeagenic bacteria, enteral viruses  
550 and parasites in a prospective cohort of 98 Dutch travellers. *Travel Med. Infect. Dis.* **19**:  
551 33–36 Available at: <https://doi.org/10.1016/j.tmaid.2017.08.003>
- 552 van Hattem JM, Arcilla MS, Schultsz C, Bootsma MC, Verhaar N, Rebers SP, Goorhuis A,  
553 Grobusch MP, Penders J, de Jong MD, van Gool T, Bart A, van Genderen PJ, Melles  
554 DC, Molhoek N, Oude Lashof AM, Stobberingh EE & Verbrugh HA (2019) Carriage of  
555 *Blastocystis* spp. in travellers - A prospective longitudinal study. *Travel Med. Infect. Dis.*  
556 **27**: 87–91 Available at: <https://doi.org/10.1016/j.tmaid.2018.06.005>
- 557 van der Hoek L, de Vries M, Oude Munnink BB, Deijs M, Canuti M, Koekkoek SM,  
558 Molenkamp R, Bakker M, Jurriaans S, van Schaik BDC, Luyf AC, Olabarriaga SD & van  
559 Kampen AHC (2012) Performance of VIDISCA-454 in feces-suspensions and serum.  
560 *Viruses* **4**: 1328–1334
- 561 Honda K & Littman DR (2012) The microbiome in infectious disease and inflammation. *Annu.*  
562 *Rev. Immunol.* **30**: 759–95 Available at:  
563 [http://apps.webofknowledge.com.proxy.library.nd.edu/full\\_record.do?product=WOS&se](http://apps.webofknowledge.com.proxy.library.nd.edu/full_record.do?product=WOS&se)  
564 [arch\\_mode=GeneralSearch&qid=2&SID=4BdSDxg2YMJDcEDk2L6&page=2&doc=20](http://apps.webofknowledge.com.proxy.library.nd.edu/full_record.do?product=WOS&se)
- 565 Hong C, Manimaran S, Shen Y, Perez-Rogers JF, Byrd AL, Castro-Nallar E, Crandall KA &  
566 Johnson WE (2014) PathoScope 2.0: A complete computational framework for strain  
567 identification in environmental or clinical sequencing samples. *Microbiome* **2**:
- 568 Huseyin CE, O'Toole PW, Cotter PD & Scanlan PD (2017) Forgotten fungi-the gut  
569 mycobiome in human health and disease. *FEMS Microbiol. Rev.* **41**: 479–511
- 570 Kim D, Sengupta A, Niepa THR, Lee BH, Weljie A, Freitas-Blanco VS, Murata RM, Stebe KJ,  
571 Lee D & Koo H (2017) *Candida albicans* stimulates *Streptococcus mutans* microcolony  
572 development via cross-kingdom biofilm-derived metabolites. *Sci. Rep.* **7**:

- 573 Kim HK, Kostidis S & Choi YH (2018) NMR analysis of fecal samples. In *Methods in*  
574 *Molecular Biology*, Giera M (ed) Springer Science + Business Media, LLC
- 575 Kinsella CM, Deijs M & van der Hoek L (2019) Enhanced bioinformatic profiling of VIDISCA  
576 libraries for virus detection and discovery. *Virus Res.* **263**: 21–26 Available at:  
577 <https://doi.org/10.1016/j.virusres.2018.12.010>
- 578 Knowles B, Silveira CB, Bailey BA, Barott K, Cantu VA, Cobian-Guëmes AG, Coutinho FH,  
579 Dinsdale EA, Felts B, Furby KA, George EE, Green KT, Gregoracci GB, Haas AF,  
580 Haggerty JM, Hester ER, Hisakawa N, Kelly LW, Lim YW, Little M, et al (2016) Lytic to  
581 temperate switching of viral communities. *Nature* **531**: 466–470 Available at:  
582 <https://www.ncbi.nlm.nih.gov/pubmed/26982729>
- 583 Kong EF, Tsui C, Kucharíková S, Van Dijck P & Jabra-Rizk MA (2017) Modulation of  
584 *Staphylococcus aureus* Response to Antimicrobials by the *Candida albicans* Quorum  
585 Sensing Molecule Farnesol. *Antimicrob. Agents Chemother.* **61**: Available at:  
586 <http://aac.asm.org/lookup/doi/10.1128/AAC.01573-17>
- 587 Kozich JJ, Westcott SL, Baxter NT, Highlander SK & Schloss PD (2013) Development of a  
588 Dual-Index Sequencing Strategy and Curation Pipeline for Analyzing Amplicon  
589 Sequence Data on the MiSeq Illumina Sequencing Platform. *Appl. Environ. Microbiol.*  
590 **79**: 5112–5120 Available at: <http://aem.asm.org/lookup/doi/10.1128/AEM.01043-13>
- 591 Kuss SK, Best GT, Etheredge CA, Pruijssers AJ, Frierson JM, Hooper L V., Dermody TS &  
592 Pfeiffer JK (2011) Intestinal Microbiota Promote Enteric Virus Replication and Systemic  
593 Pathogenesis. *Science (80-. )*. **334**: 249–252 Available at:  
594 <http://www.sciencemag.org/cgi/doi/10.1126/science.1211057>
- 595 Lankelma JM, Cranendonk DR, Belzer C, De Vos AF, De Vos WM, Van Der Poll T &  
596 Wiersinga WJ (2017a) Antibiotic-induced gut microbiota disruption during human  
597 endotoxemia: A randomised controlled study. *Gut* **66**: 1623–1630
- 598 Lankelma JM, van Vught LA, Belzer C, Schultz MJ, van der Poll T, de Vos WM, Wiersinga  
599 WJ, Vught LA Van, Belzer C, Schultz MJ, Poll T Van Der, Vos WM De & Wiersinga WJ  
600 (2017b) Critically ill patients demonstrate large interpersonal variation in intestinal  
601 microbiota dysregulation : a pilot study. *Intensive Care Med.* **43**: 59–68
- 602 Lee YJ, Arguello ES, Jenq RR, Littmann E, Kim GJ, Miller LC, Ling L, Figueroa C, Robilotti  
603 E, Perales M-A, Barker JN, Giralt S, van den Brink MRM, Pamer EG & Taur Y (2017)  
604 Protective Factors in the Intestinal Microbiome Against *Clostridium difficile* Infection in

- 605 Recipients of Allogeneic Hematopoietic Stem Cell Transplantation. *J. Infect. Dis.* **215**:  
606 1117–1123 Available at: <https://academic.oup.com/jid/article/215/7/1117/3813430>
- 607 Legoff J, Resche-Rigon M, Bouquet J, Robin M, Naccache SN, Mercier-Delarue S,  
608 Federman S, Samayoa E, Rousseau C, Piron P, Kapel N, Simon F, Socié G & Chiu CY  
609 (2017) The eukaryotic gut virome in hematopoietic stem cell transplantation: New clues  
610 in enteric graft-versus-host disease. *Nat. Med.* **23**: 1080–1085 Available at:  
611 <http://dx.doi.org/10.1038/nm.4380>
- 612 Li H (2013) Aligning sequence reads, clone sequences and assembly contigs with BWA-  
613 MEM. *arXiv* Available at: <http://arxiv.org/abs/1303.3997>
- 614 Liu CM, Kachur S, Dwan MG, Abraham AG, Aziz M, Hsueh P-R, Huang Y-T, Busch JD,  
615 Lamit LJ, Gehring CA, Keim P & Price LB (2012) FungiQuant: A broad-coverage fungal  
616 quantitative real-time PCR assay. *BMC Microbiol.* **12**: 255 Available at:  
617 <http://bmcmicrobiol.biomedcentral.com/articles/10.1186/1471-2180-12-255>
- 618 McDonald D, Ackermann G, Khailova L, Baird C, Heyland D, Kozar R, Lemieux M, Derenski  
619 K, King J, Vis-Kampen C, Knight R & Wischmeyer PE (2016) Extreme Dysbiosis of the  
620 Microbiome in Critical Illness. *mSphere* **1**: 1–6 Available at:  
621 <http://msphere.asm.org/lookup/doi/10.1128/mSphere.00199-16>
- 622 Miceli MH, Díaz JA & Lee SA (2011) Emerging opportunistic yeast infections. *Lancet Infect.*  
623 *Dis.* **11**: 142–151 Available at: [http://dx.doi.org/10.1016/S1473-3099\(10\)70218-8](http://dx.doi.org/10.1016/S1473-3099(10)70218-8)
- 624 Nadkarni MA, Martin FE, Jacques NA & Hunter N (2002) Determination of bacterial load by  
625 real-time PCR using a broad-range (universal) probe and primers set. *Microbiology* **148**:  
626 257–266 Available at:  
627 [https://www.microbiologyresearch.org/content/journal/micro/10.1099/00221287-148-1-](https://www.microbiologyresearch.org/content/journal/micro/10.1099/00221287-148-1-257)  
628 [257](https://www.microbiologyresearch.org/content/journal/micro/10.1099/00221287-148-1-257)
- 629 Nash AK, Auchtung TA, Wong MC, Smith DP, Gesell JR, Ross MC, Stewart CJ, Metcalf GA,  
630 Muzny DM, Gibbs RA, Ajami NJ & Petrosino JF (2017) The gut mycobiome of the  
631 Human Microbiome Project healthy cohort. *Microbiome* **5**: 153 Available at:  
632 <https://www.ncbi.nlm.nih.gov/pubmed/29178920>
- 633 Neil JA & Cadwell K (2018) The Intestinal Virome and Immunity. *J. Immunol.* **201**: 1615–  
634 1624 Available at: <https://www.ncbi.nlm.nih.gov/pubmed/30181300>
- 635 Nguyen LN, Lopes LCL, Cordero RJBB & Nosanchuk JD (2011) Sodium butyrate inhibits



- 636 pathogenic yeast growth and enhances the functions of macrophages. *J. Antimicrob.*  
637 *Chemother.* **66**: 2573–2580 Available at:  
638 <https://www.ncbi.nlm.nih.gov/pubmed/21911344>
- 639 Nilsson RH, Larsson K-H, Taylor AFS, Bengtsson-Palme J, Jeppesen TS, Schigel D,  
640 Kennedy P, Picard K, Glöckner FO, Tedersoo L, Saar I, Kõljalg U & Abarenkov K (2019)  
641 The UNITE database for molecular identification of fungi: handling dark taxa and parallel  
642 taxonomic classifications. *Nucleic Acids Res.* **47**: D259–D264 Available at:  
643 <https://academic.oup.com/nar/article/47/D1/D259/5146189>
- 644 Norman JM, Handley SA & Virgin HW (2014) Kingdom-Agnostic Metagenomics and the  
645 Importance of Complete Characterization of Enteric Microbial Communities.  
646 *Gastroenterology* **146**: 1459–1469 Available at:  
647 <https://www.ncbi.nlm.nih.gov/pmc/articles/PMC3624763/pdf/nihms412728.pdf>
- 648 Pfeiffer JK & Virgin HW (2016) Transkingdom control of viral infection and immunity in the  
649 mammalian intestine. *Science (80-. )*. **351**: aad5872–aad5872 Available at:  
650 <https://linkinghub.elsevier.com/retrieve/pii/S0031938416312148>
- 651 Quast C, Pruesse E, Yilmaz P, Gerken J, Schweer T, Yarza P, Peplies J & Glöckner FO  
652 (2013) The SILVA ribosomal RNA gene database project: Improved data processing  
653 and web-based tools. *Nucleic Acids Res.* **41**: 590–596
- 654 Richard ML & Sokol H (2019) The gut mycobiota: insights into analysis, environmental  
655 interactions and role in gastrointestinal diseases. *Nat. Rev. Gastroenterol. Hepatol.* **16**:  
656 331–345 Available at: <http://dx.doi.org/10.1038/s41575-019-0121-2>
- 657 Ruijter JM, Ramakers C, Hoogaars WMH, Karlen Y, Bakker O, van den Hoff MJB &  
658 Moorman AFM (2009) Amplification efficiency: linking baseline and bias in the analysis  
659 of quantitative PCR data. *Nucleic Acids Res.* **37**: e45–e45 Available at:  
660 <https://academic.oup.com/nar/article-lookup/doi/10.1093/nar/gkp045>
- 661 Schuijt TJ (2015) The gut microbiota plays a protective role in the host defence against  
662 pneumococcal pneumonia. *Gut*: 1–9 Available at:  
663 <http://gut.bmj.com/content/early/2015/10/28/gutjnl-2015-309728?paperetoc>
- 664 Shkoporov AN, Clooney AG, Sutton TDS, Ryan FJ, Daly KM, Nolan JA, McDonnell SA,  
665 Khokhlova E V., Draper LA, Forde A, Guerin E, Velayudhan V, Ross RP & Hill C (2019)  
666 The Human Gut Virome Is Highly Diverse, Stable, and Individual Specific. *Cell Host*  
667 *Microbe* **26**: 527-541.e5 Available at: <https://doi.org/10.1016/j.chom.2019.09.009>

- 668 Shkoporov AN & Hill C (2019) Bacteriophages of the Human Gut: The “Known Unknown” of  
669 the Microbiome. *Cell Host Microbe* **25**: 195–209 Available at:  
670 <https://doi.org/10.1016/j.chom.2019.01.017>
- 671 Shkoporov AN, Khokhlova E V., Fitzgerald CB, Stockdale SR, Draper LA, Ross RP & Hill C  
672 (2018)  $\Phi$ CrAss001 represents the most abundant bacteriophage family in the human  
673 gut and infects *Bacteroides intestinalis*. *Nat. Commun.* **9**: 1–8 Available at:  
674 <http://dx.doi.org/10.1038/s41467-018-07225-7>
- 675 Sokol H, Leducq V, Aschard H, Pham HP, Jegou S, Landman C, Cohen D, Liguori G,  
676 Bourrier A, Nion-Larmurier I, Cosnes J, Seksik P, Langella P, Skurnik D, Richard ML &  
677 Beaugerie L (2017) Fungal microbiota dysbiosis in IBD. *Gut* **66**: 1039–1048 Available  
678 at: <https://www.ncbi.nlm.nih.gov/pubmed/26843508>
- 679 De Sordi L, Lourenço M & Debarbieux L (2019) The Battle Within: Interactions of  
680 Bacteriophages and Bacteria in the Gastrointestinal Tract. *Cell Host Microbe* **25**: 210–  
681 218 Available at: <https://linkinghub.elsevier.com/retrieve/pii/S1931312819300587>
- 682 Sovran B, Planchais J, Jegou S, Straube M, Lamas B, Natividad JM, Agus A, Dupraz L,  
683 Glodt J, Da Costa G, Michel M-L, Langella P, Richard ML & Sokol H (2018)  
684 Enterobacteriaceae are essential for the modulation of colitis severity by fungi.  
685 *Microbiome* **6**: 152 Available at:  
686 <https://microbiomejournal.biomedcentral.com/articles/10.1186/s40168-018-0538-9>
- 687 Suhr MJ & Hallen-Adams HE (2015) The human gut mycobiome: Pitfalls and potentials-a  
688 mycologist’s perspective. *Mycologia* **107**: 1057–1073
- 689 Taur Y, Xavier JB, Lipuma L, Ubeda C, Goldberg J, Gobourne A, Lee YJ, Dubin KA, Socci  
690 ND, Viale A, Perales M-A, Jenq RR, van den Brink MRM & Pamer EG (2012) Intestinal  
691 Domination and the Risk of Bacteremia in Patients Undergoing Allogeneic  
692 Hematopoietic Stem Cell Transplantation. *Clin. Infect. Dis.* **55**: 905–914 Available at:  
693 <https://academic.oup.com/cid/article-lookup/doi/10.1093/cid/cis580>
- 694 Uppuluri P, Busscher HJ, Chakladar J, van der Mei HC & LaJean Chaffin W (2017)  
695 Transcriptional profiling of *C. albicans* in a two species biofilm with *Rothia dentocariosa*.  
696 *Front. Cell. Infect. Microbiol.* **7**:
- 697 van Vught LA, Klein Klouwenberg PMC, Spitoni C, Scicluna BP, Wiewel MA, Horn J, Schultz  
698 MJ, Nürnberg P, Bonten MJM, Cremer OL & van der Poll T (2016) Incidence, Risk  
699 Factors, and Attributable Mortality of Secondary Infections in the Intensive Care Unit

- 700 After Admission for Sepsis. *JAMA* **315**: 1469 Available at:  
701 <http://jama.jamanetwork.com/article.aspx?doi=10.1001/jama.2016.2691>
- 702 Wang Q, Garrity GM, Tiedje JM & Cole JR (2007) Naive Bayesian Classifier for Rapid  
703 Assignment of rRNA Sequences into the New Bacterial Taxonomy. *Appl. Environ.*  
704 *Microbiol.* **73**: 5261–5267 Available at: [http://aem.asm.org/cgi/doi/10.1128/AEM.00062-](http://aem.asm.org/cgi/doi/10.1128/AEM.00062-07)  
705 07
- 706 Wischmeyer PE, McDonald D & Knight R (2016) Role of the microbiome, probiotics, and  
707 ‘dysbiosis therapy’ in critical illness. *Curr. Opin. Crit. Care* **22**: 347–353 Available at:  
708 <https://www.ncbi.nlm.nih.gov/pubmed/27327243>
- 709 Zaborin D. and Garfield, K. and Quensen, J. and Shakhsheer, B. and Kade, M. and Tirrell,  
710 M. and Tiedje, J. and Gilbert, J. A. and Zaborina, O. and Alverdy, J. C. A and S  
711 Membership and behavior of ultra-low-diversity pathogen communities present in the  
712 gut of humans during prolonged critical illness. *MBio* **5**: e01361-14
- 713 Zhai B, Ola M, Rolling T, Tosini NL, Joshowitz S, Littmann ER, Amoretti LA, Fontana E,  
714 Wright RJ, Miranda E, Veelken CA, Morjaria SM, Peled JU, van den Brink MRM,  
715 Babady NE, Butler G, Taur Y & Hohl TM (2020) High-resolution mycobiota analysis  
716 reveals dynamic intestinal translocation preceding invasive candidiasis. *Nat. Med.* **26**:  
717 59–64 Available at: <http://dx.doi.org/10.1038/s41591-019-0709-7>
- 718 Zuo T, Lu XJ, Zhang Y, Cheung CP, Lam S, Zhang F, Tang W, Ching JYL, Zhao R, Chan  
719 PKS, Sung JJY, Yu J, Chan FKL, Cao Q, Sheng JQ & Ng SC (2019) Gut mucosal  
720 virome alterations in ulcerative colitis. *Gut* **68**: 1169–1179
- 721
